# Supplementary material
Source: PubMed Central journal article supplement (PMC5632736)
Supplement: jnm191452SupplementaryData.pdf [file jnm191452SupplementaryData.pdf]

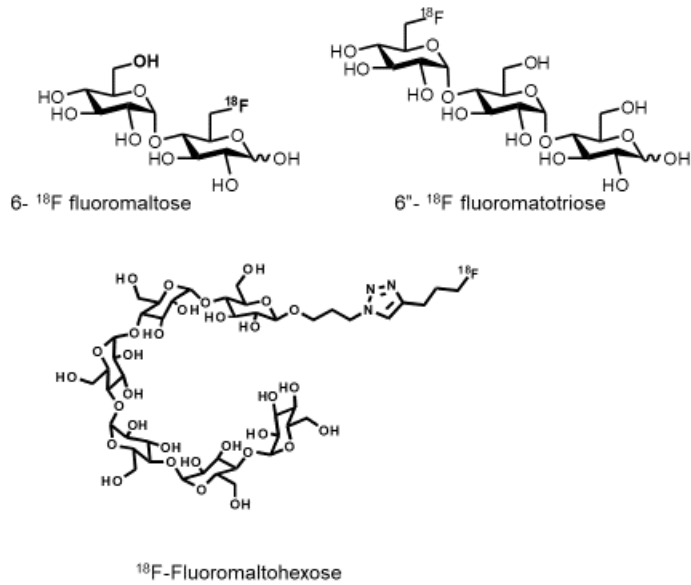

**Supplemental figure 1:** Scheme showing the structures of the three different tracers targeting the maltodextrin transporter

Supplementary figure 2

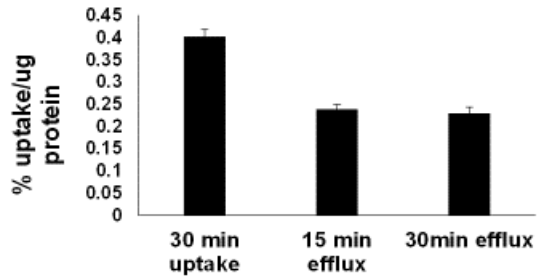

**Supplemental figure 2:** Efflux of 6''-<sup>18</sup>F-fluoromaltotriose at 15 minutes and 30 minutes, following an initial 30 minutes incubation with the tracer. Error bars represent standard deviation

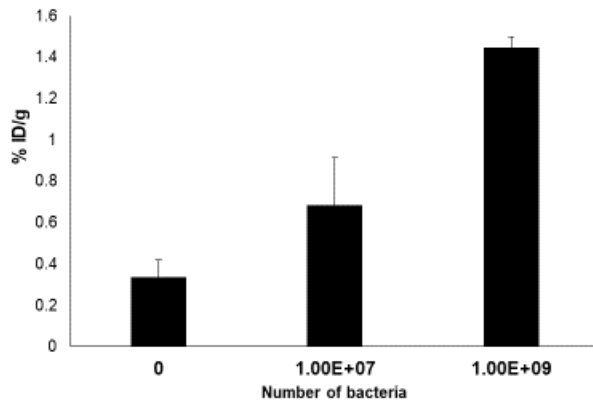

**Supplemental figure 3:** Ex-vivo bio-distribution showing the uptake of  $67\text{-}^{18}\text{F}$ -fluoromaltotriose in nude mice bearing different number of implanted *E.coli* (n=3 for each time point) 1h after administration of tracer. Error bars represent standard deviation.

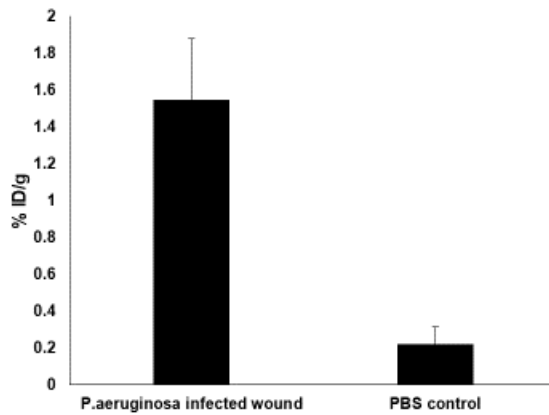

**Supplemental figure 4:** Ex-vivo biodistribution showing the uptake of  $67\text{-}^{18}\text{F}$ -fluoromaltotriose in *Pseudomonas aeruginosa* infected wounds (n=6) versus wounds in the control mice (n=3). Error bars represent standard deviation.

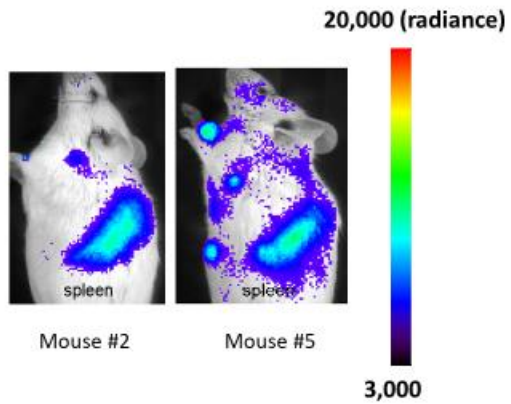

**Supplemental figure 5:** Bioluminescence imaging of mice 24h after the intravenous administration of  $2 \times 10^5$  CFU of Xen 32, a bioluminescent strain of *Listeria monocytogenes*

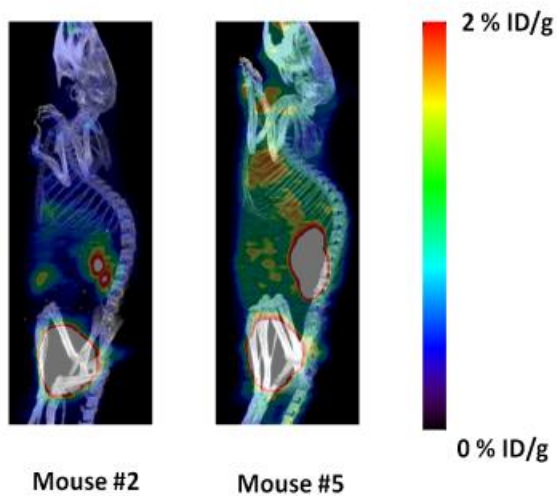

**Supplemental figure 6:** Maximum intensity projections from microPET/CT scans, of the same mice shown in supplementary figure 5, 1h after the injection of 7.4MBq of  $^{67}\text{-}^{18}\text{F}$ -fluoromaltotriose.

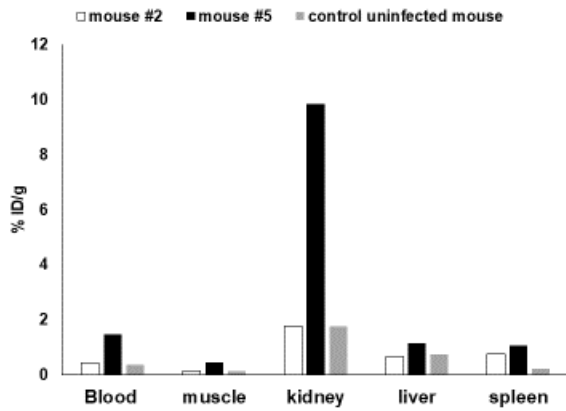

**Supplemental figure 7:** Ex vivo biodistribution of the same mice shown in supplementary figure 5 and 6, showing the uptake of  $6^{71}\text{-}^{18}\text{F}$ -fluoromaltotriose in the blood, kidney and spleen

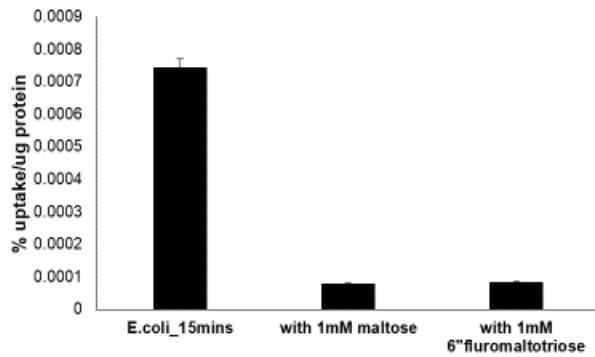

**Supplemental figure 8:** Uptake of  $^3\text{H}$ -maltose in E.coli for the indicated time with and without excess cold maltose or cold  $6^{71}\text{-}^{18}\text{F}$ -fluoromaltotriose
